# Supplementary figures and images for: Genetic ablation of Rest leads to in vitro-specific derepression of neuronal genes during neurogenesis
Source: Oxford University Press journal article supplement (doi:10.1242/dev.072272), 2012-01-13

Relative expression to  $\beta$ -actin

*Stmn2*

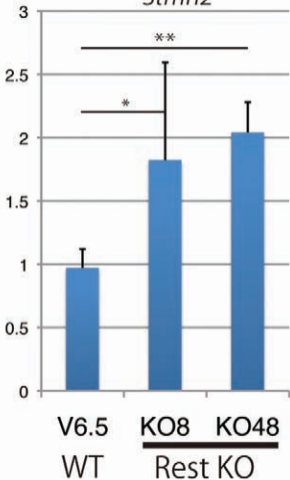

Supplement: dev072272figs1.pdf [file dev072272figs1.pdf]

E16.5

Control

Nestin

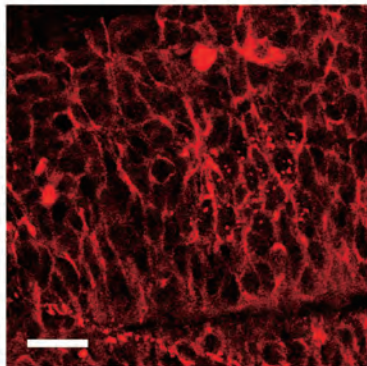

Tuj1

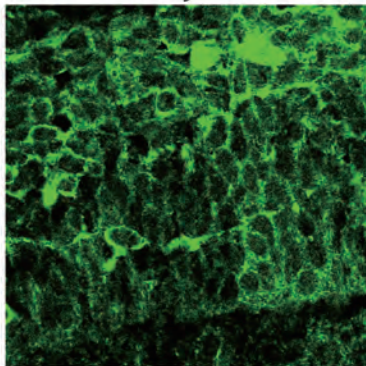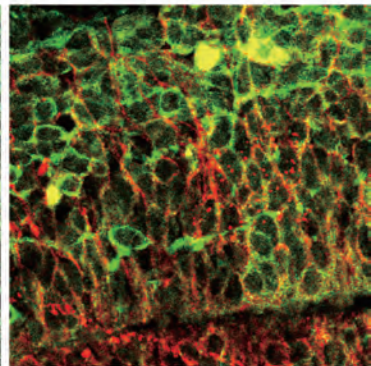

Rest CKO

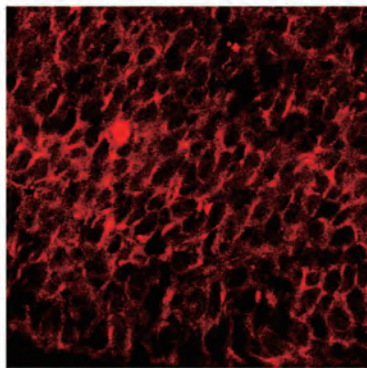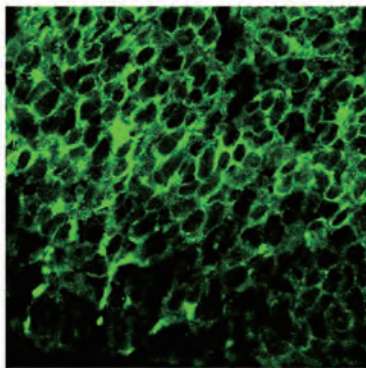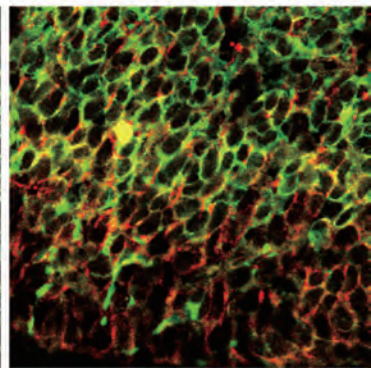

Supplement: dev072272figs10.pdf [file dev072272figs10.pdf]

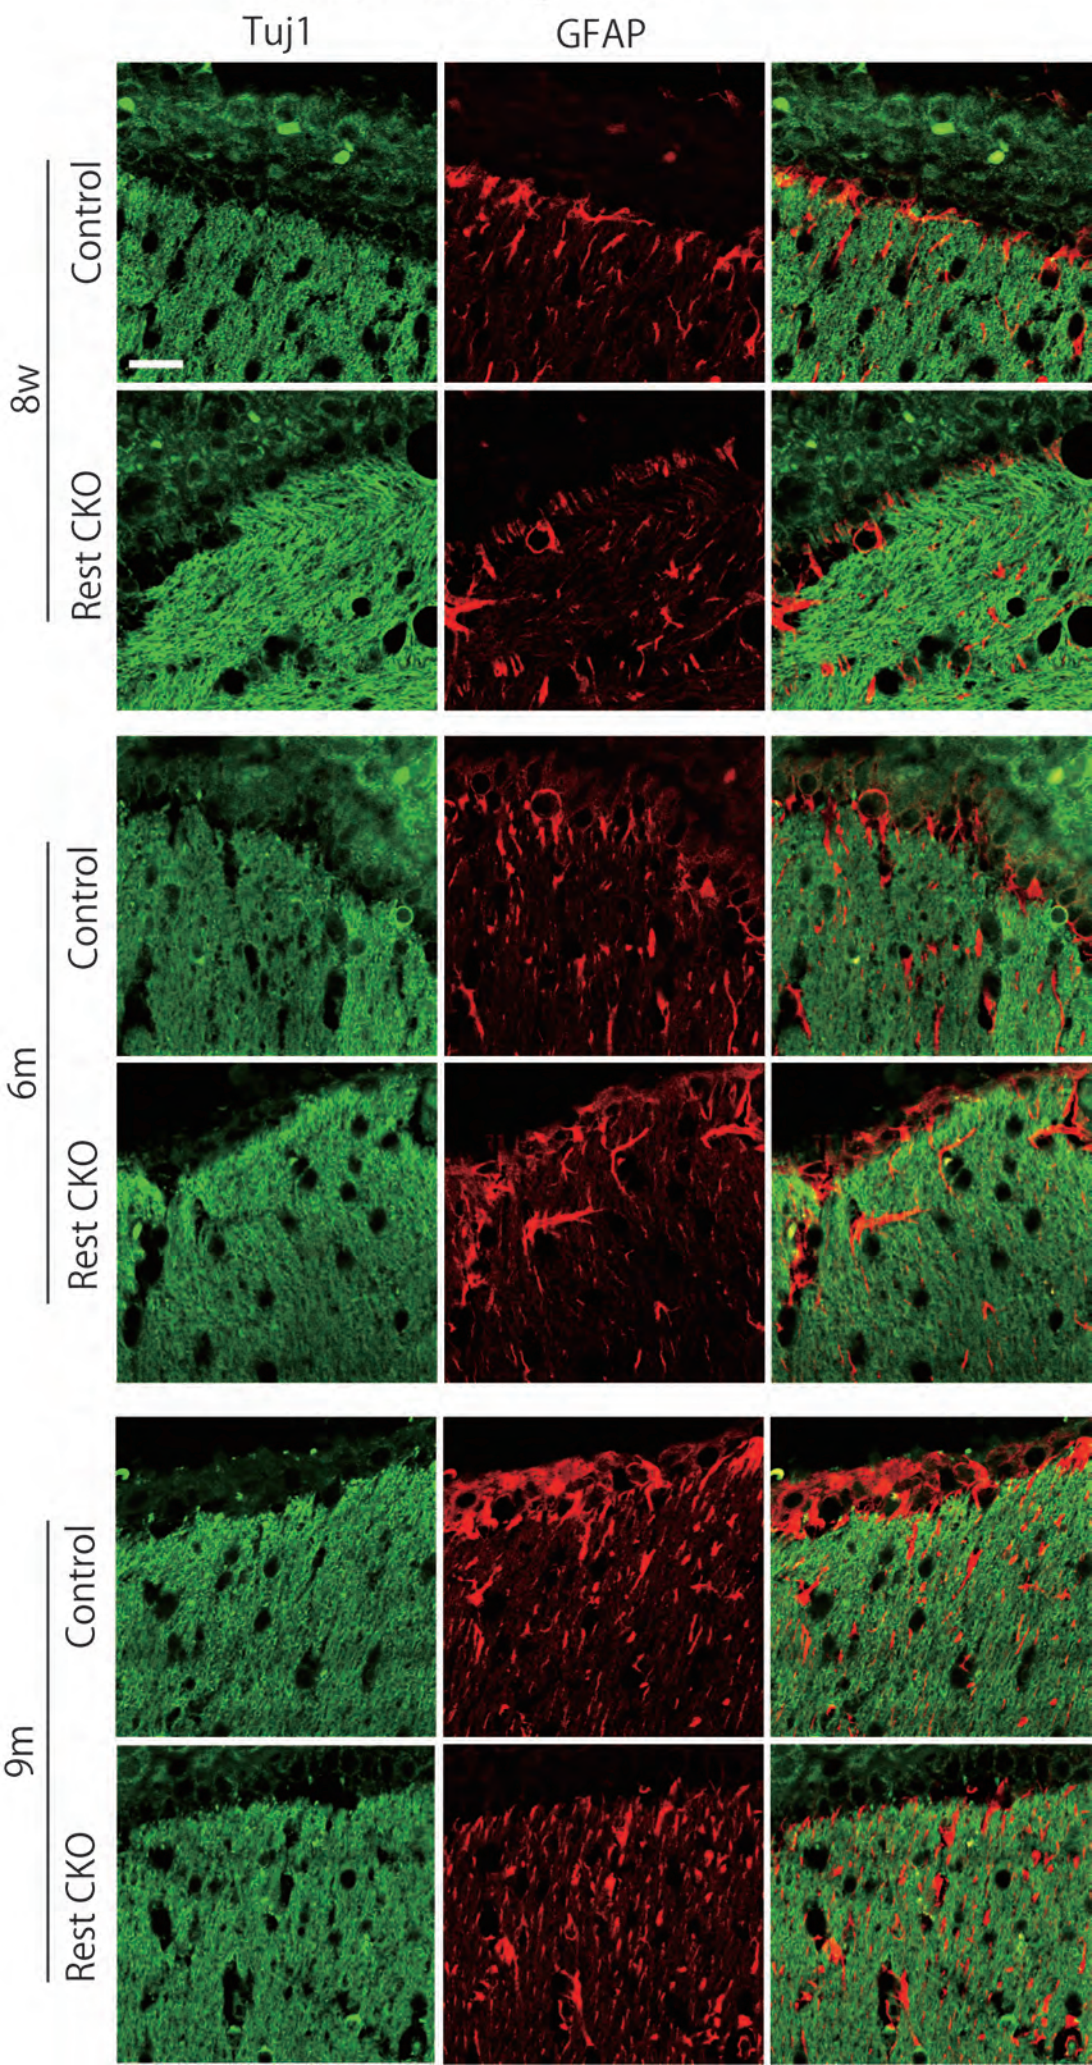

Supplement: dev072272figs11.pdf [file dev072272figs11.pdf]

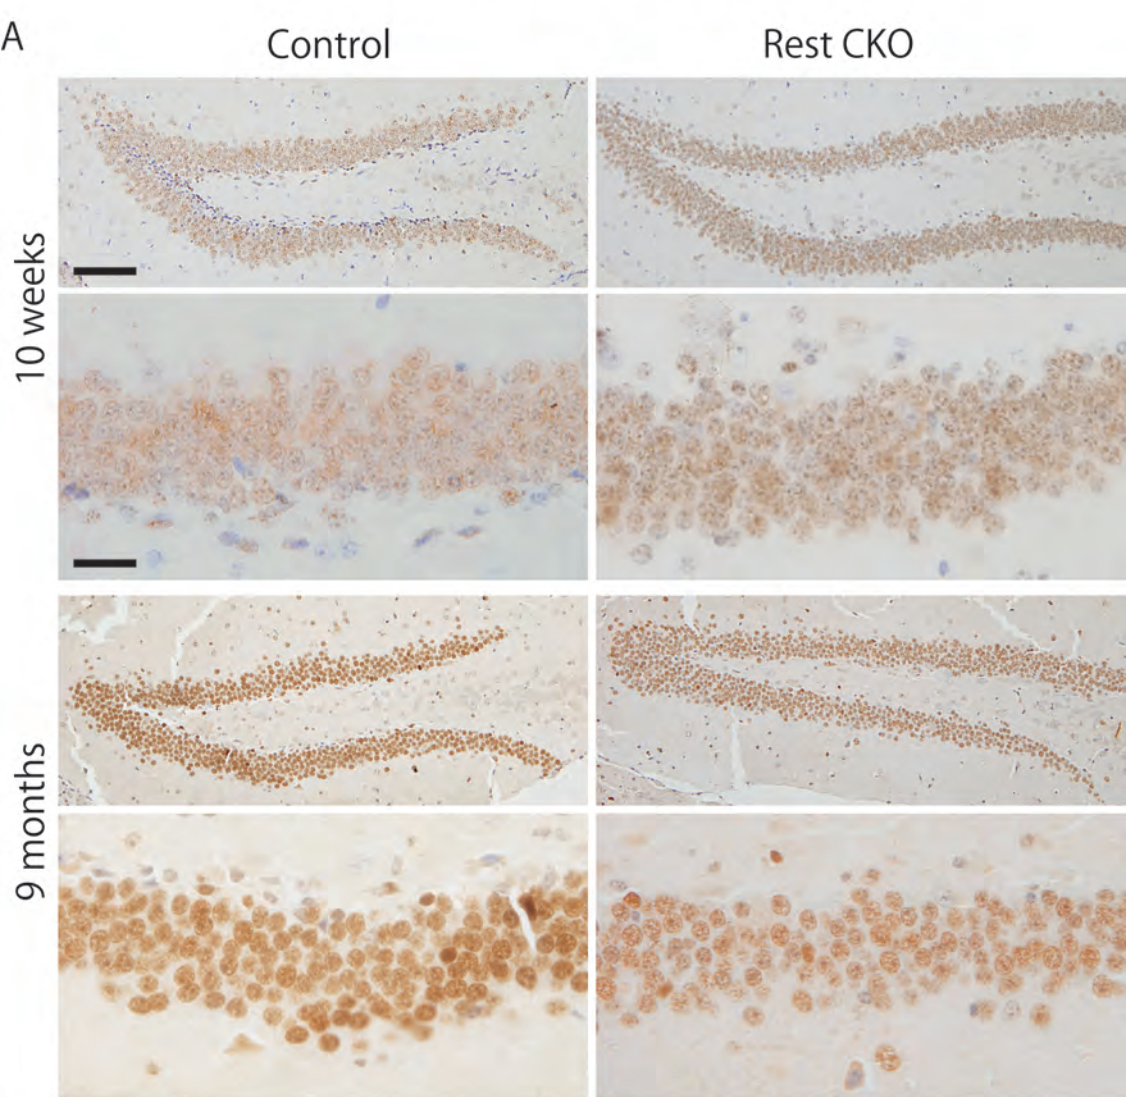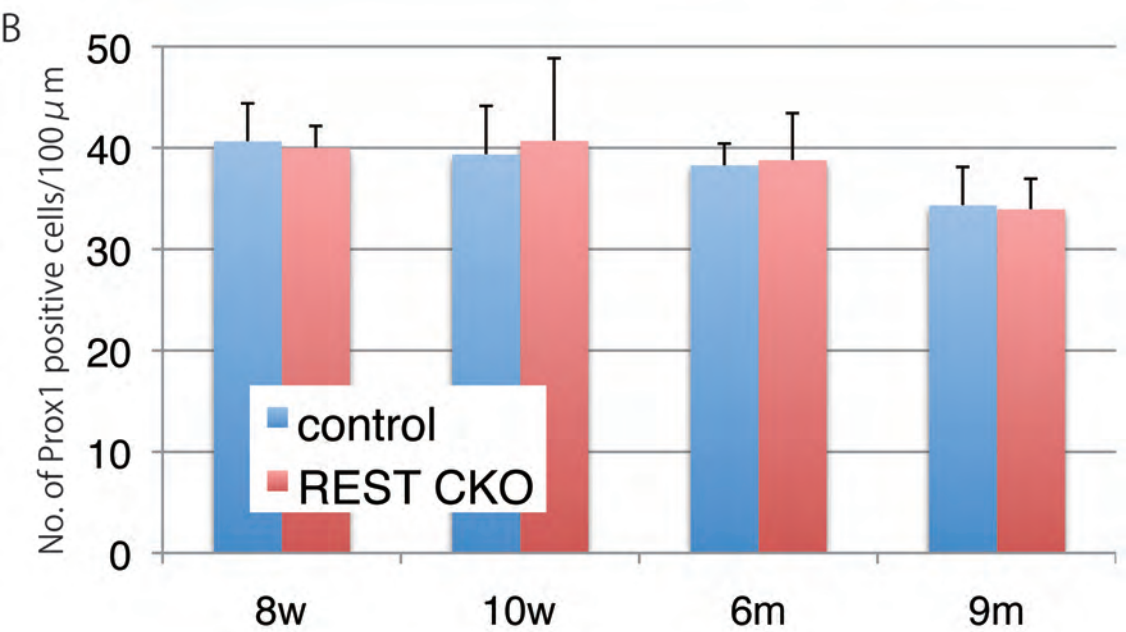

Supplement: dev072272figs12.pdf [file dev072272figs12.pdf]

Relative expression to  $\beta$ -actin

*FSP1*

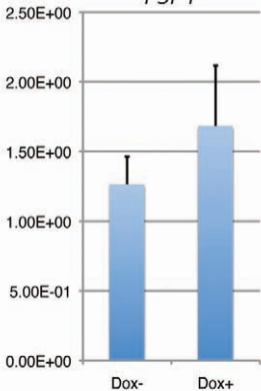

Supplement: dev072272figs2.pdf [file dev072272figs2.pdf]

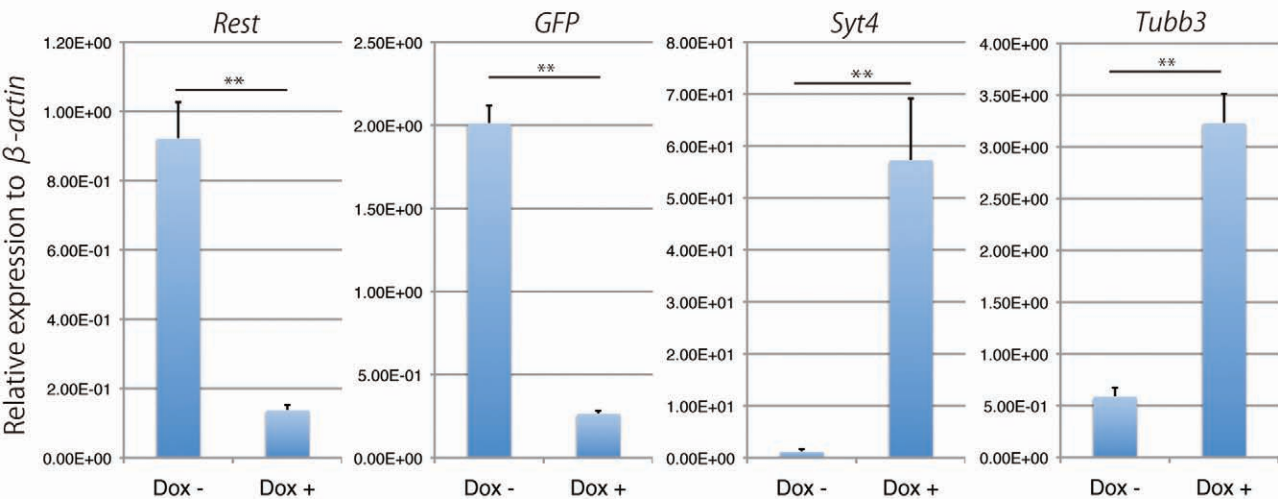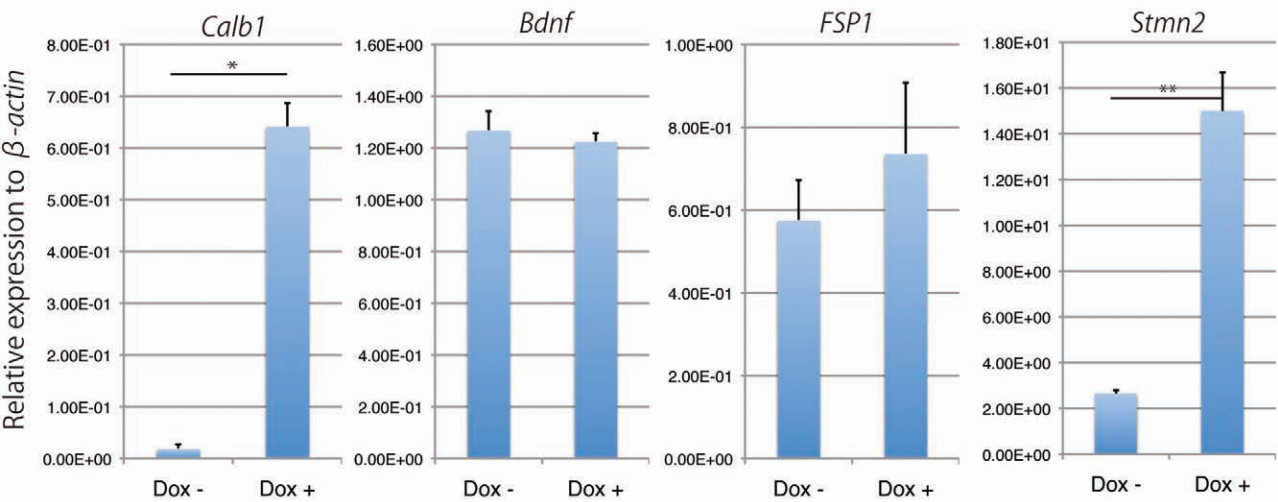

Supplement: dev072272figs3.pdf [file dev072272figs3.pdf]

Relative expression to  $\beta$ -actin

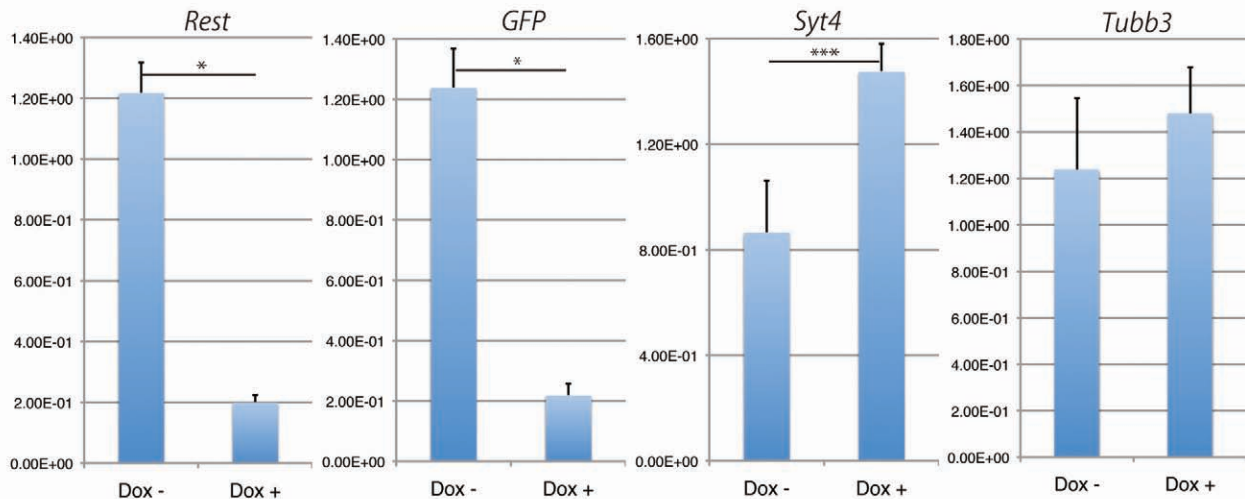

Relative expression to  $\beta$ -actin

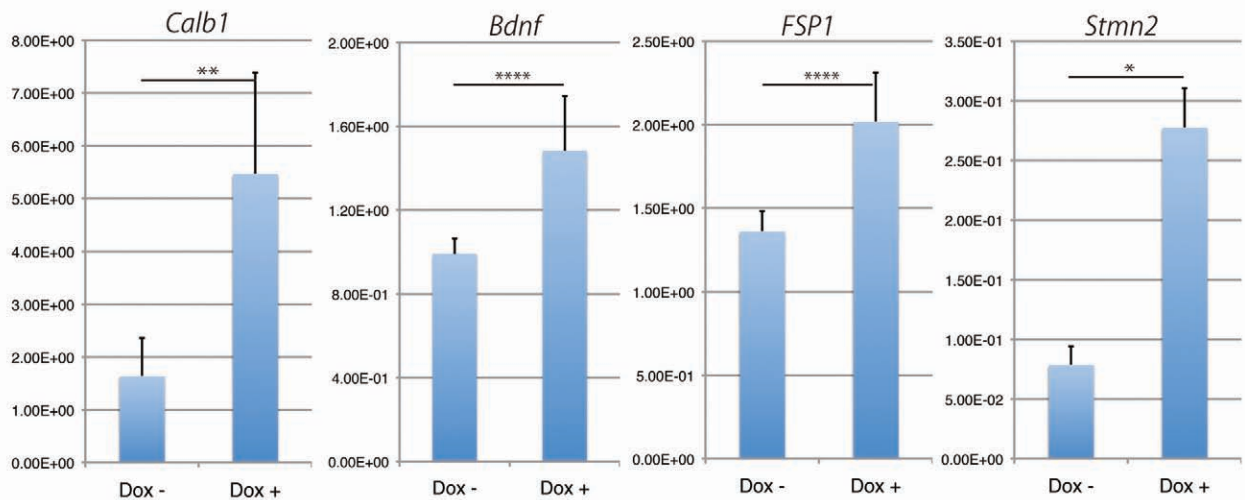

Supplement: dev072272figs4.pdf [file dev072272figs4.pdf]

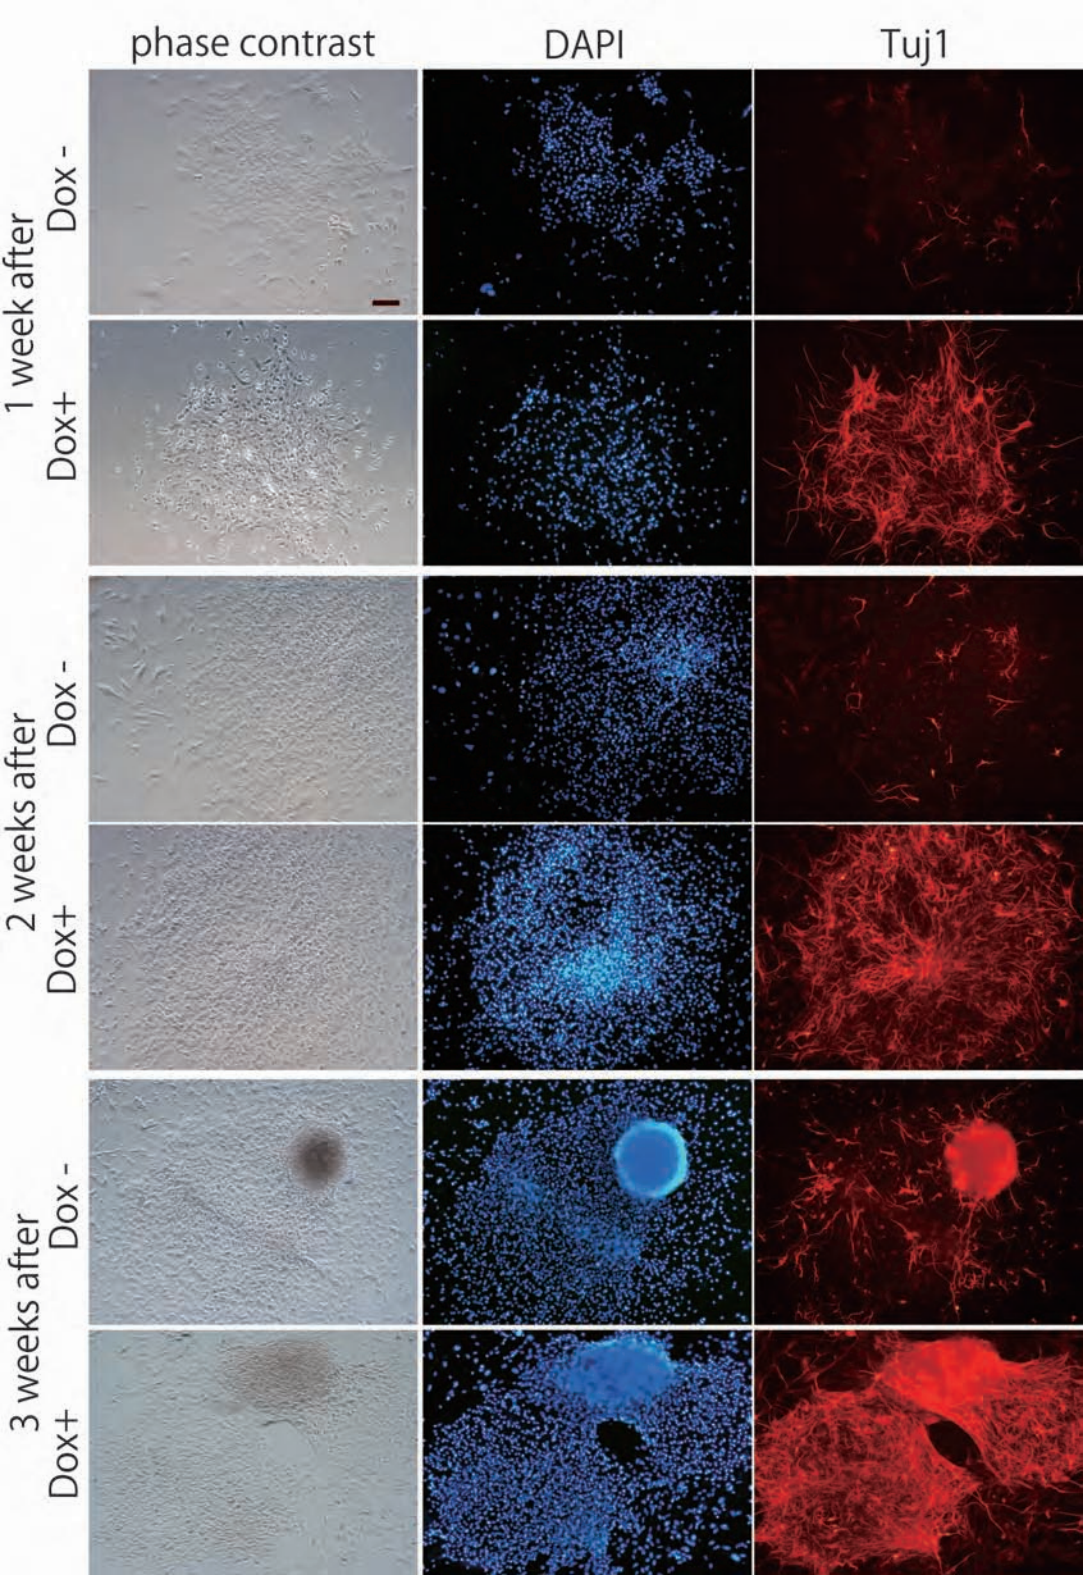

Supplement: dev072272figs5.pdf [file dev072272figs5.pdf]

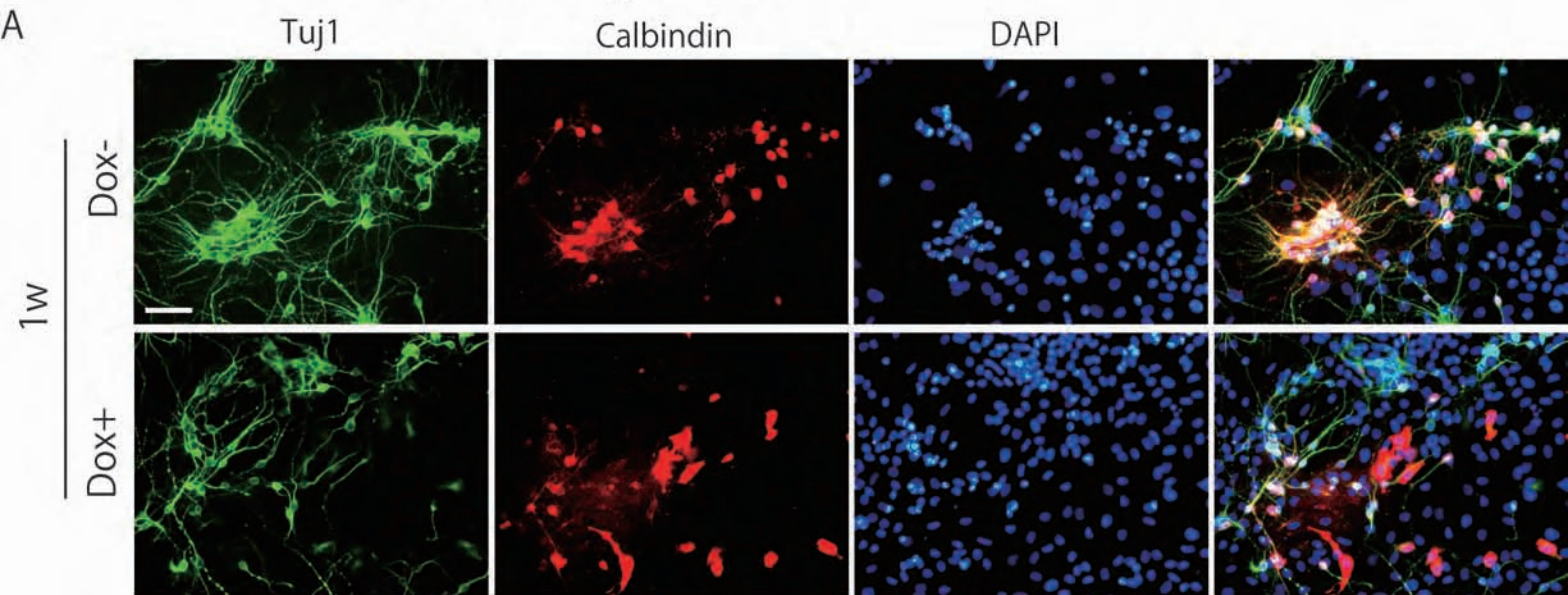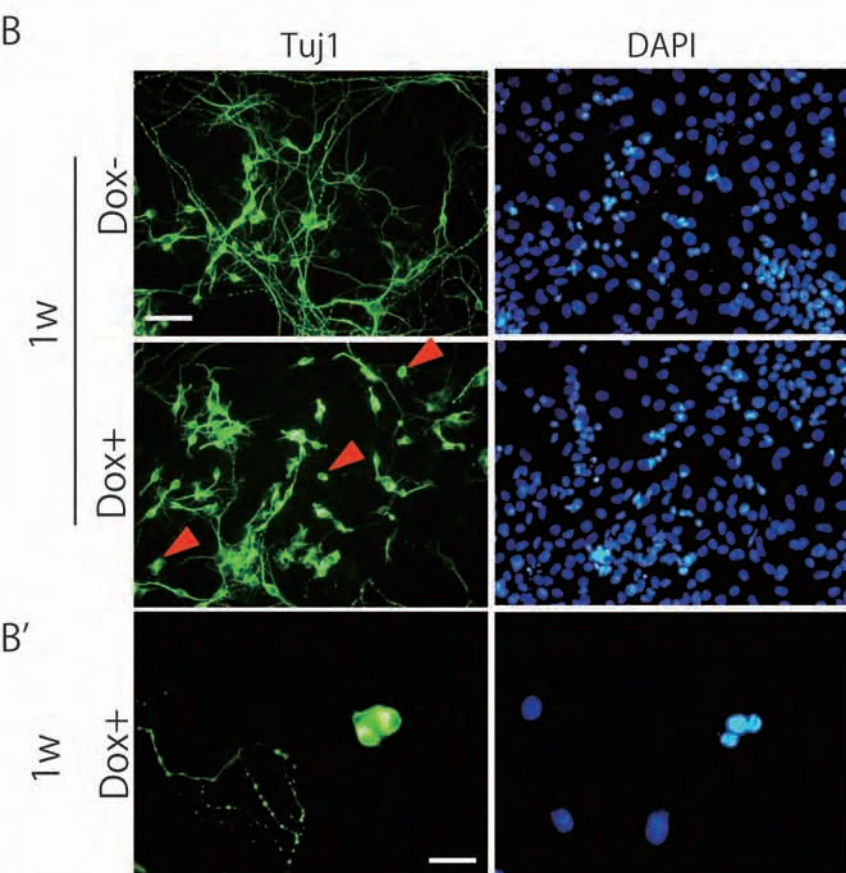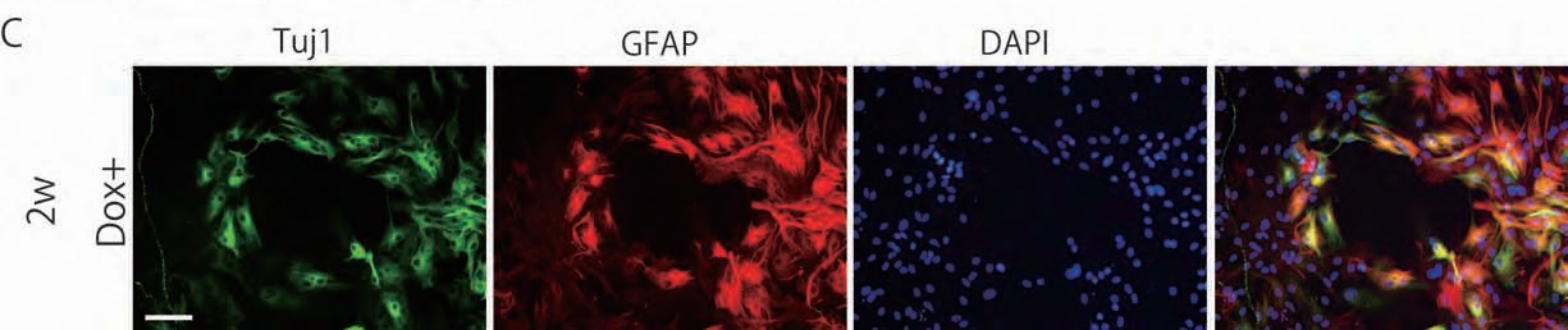

Supplement: dev072272figs6.pdf [file dev072272figs6.pdf]

Relative expression to  $\beta$ -actin

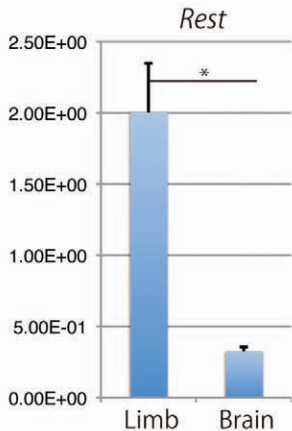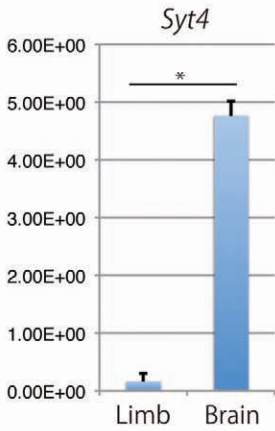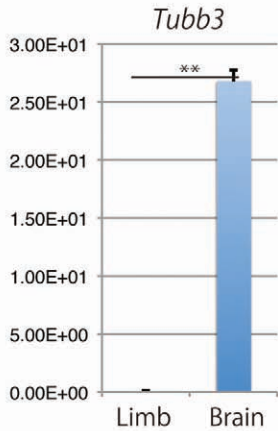

Supplement: dev072272figs7.pdf [file dev072272figs7.pdf]

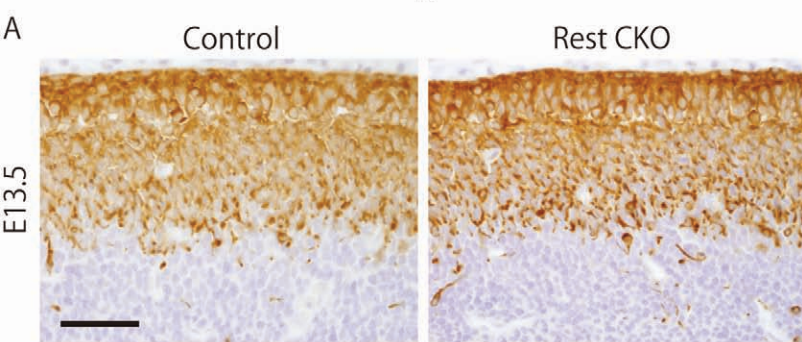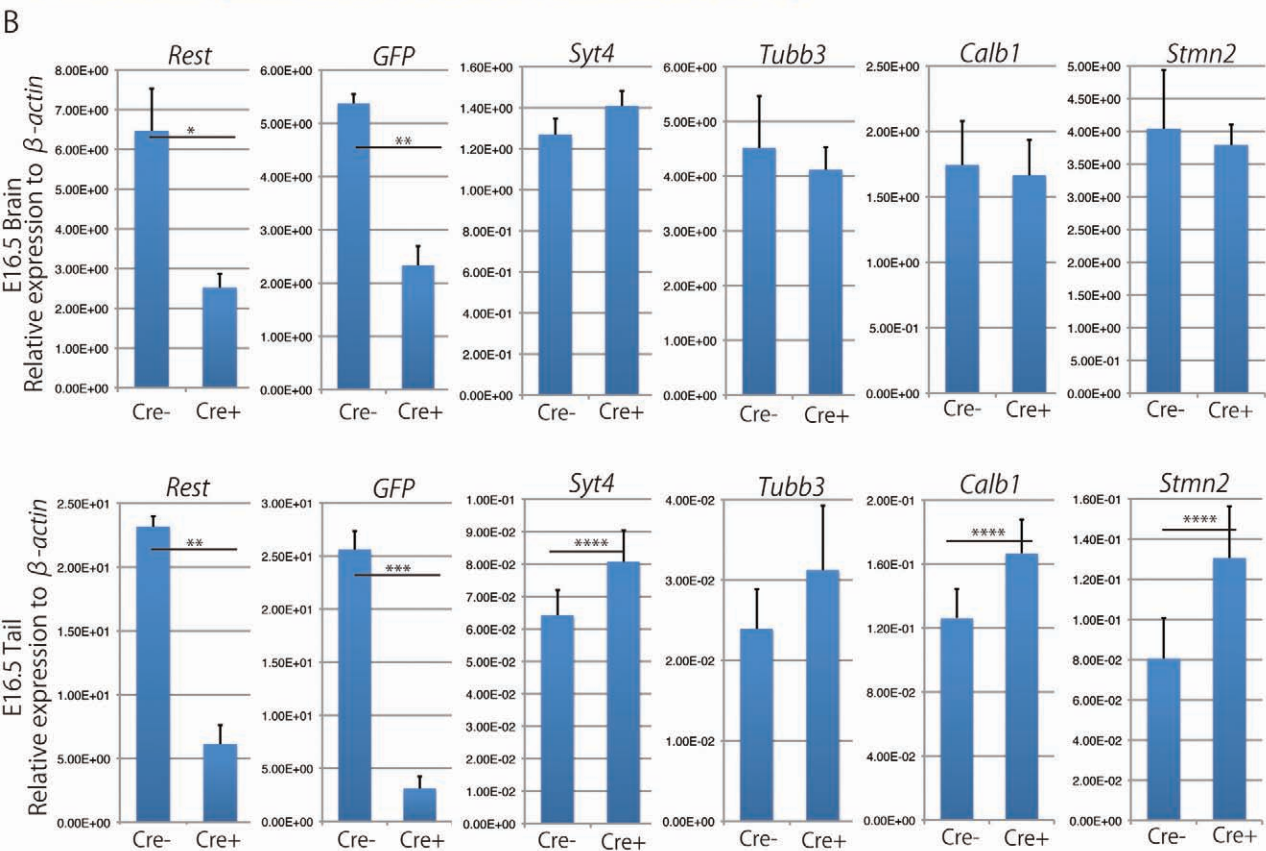

Supplement: dev072272figs8.pdf [file dev072272figs8.pdf]

E13.5

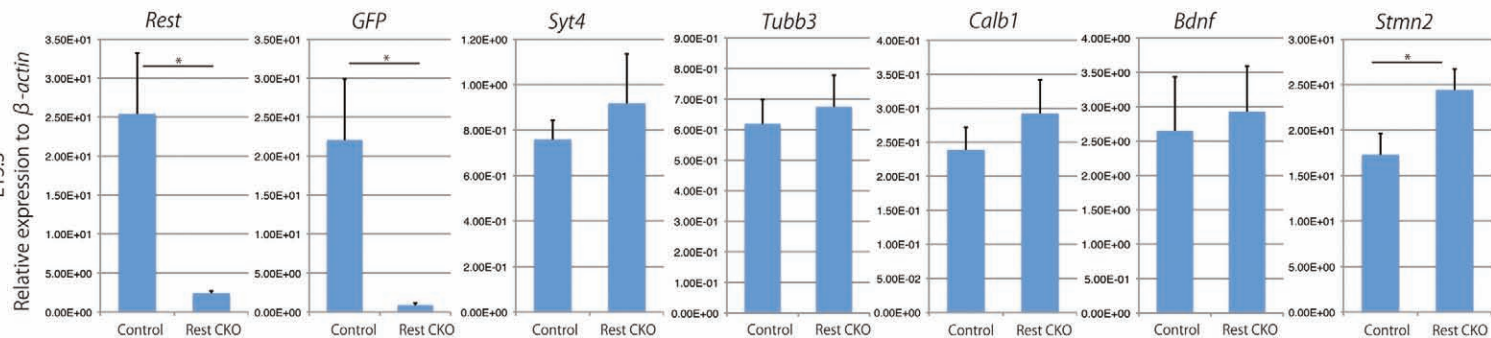

E16.5

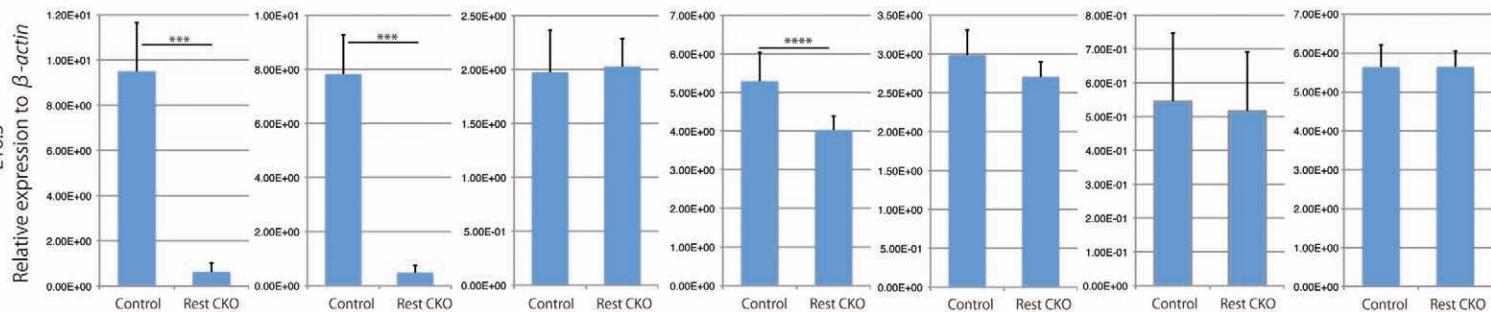

P0

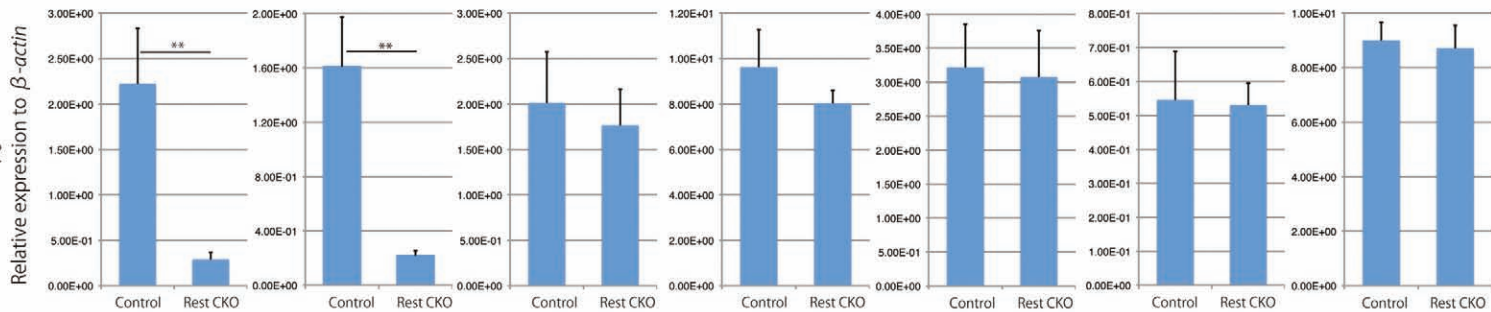

Supplement: dev072272figs9.pdf [file dev072272figs9.pdf]
